# Supplementary material
Source: Springer Nature journal article supplement (https://www.springermedizin.de/resource/supplementary/13058_2012_3184_MOESM4_ESM.pdf/9703456)

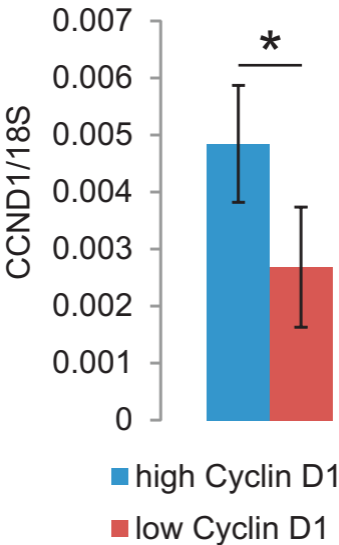

Supplement: MOESM4 [file 9703456]
